# Supplementary material
Source: ML conference proceedings conference paper supplement (https://proceedings.neurips.cc/paper_files/paper/2019/hash/8a50bae297807da9e97722a0b3fd8f27-Abstract.html)
Supplement: Supplementary file [file 8a50bae297807da9e97722a0b3fd8f27-Supplemental.zip]

---

# Supplementary Material of Learning from Crap Data via Generation

---

Anonymous Author(s)

Affiliation

Address

email

## 1 A Proofs

2 In this section, we denote  $\mathbf{z} = (\mathbf{x}, y)$  and  $\mathbf{z} \in \mathcal{Z}$  for convenience.

### 3 A.1 Proof of Theorem 1

4 **Theorem 1.** *With the optimal critical network  $D$  and the classifier  $C$  fixed, the optimization of*  
 5 *generator  $G$  is equivalent to minimize  $\lambda \cdot d_W(\hat{\mathbb{P}}_N, \mathbb{Q}) - D_{KL}(\mathbb{Q}||\mathbb{P}_c)$ .*

6 *Proof.* Recall the objective function defined in Eq. (1),

$$\min_G \max_{D, C} U(C, G, D) = \lambda(\mathbb{E}_{\hat{\mathbb{P}}_N}[D(\mathbf{x}, y)] - \mathbb{E}_{\mathbb{Q}}[D(\mathbf{x}, y)]) - \mathbb{E}_{\mathbb{Q}}[\ell(C(\mathbf{x}), y)]. \quad (1)$$

7 Given the optimal critical network  $D$  and classifier  $C$ , the generator  $G$  is optimized by minimizing  
 8 the function

$$V_{C, D}(G) = \lambda(\mathbb{E}_{\hat{\mathbb{P}}_N}[D(\mathbf{x}, y)] - \mathbb{E}_{\mathbb{Q}}[D(\mathbf{x}, y)]) - \mathbb{E}_{\mathbb{Q}}[\ell(C(\mathbf{x}), y)]. \quad (2)$$

9 As the critical network  $D$  is optimized for describe the Wasserstein, which means that

$$\mathbb{E}_{\hat{\mathbb{P}}_N}[D(\mathbf{x}, y)] - \mathbb{E}_{\mathbb{Q}}[D(\mathbf{x}, y)] = d_W(\hat{\mathbb{P}}_N, \mathbb{Q}). \quad (3)$$

10 Then we consider the last term in Eq. (2),

$$\begin{aligned} \mathbb{E}_{\mathbb{Q}}[\ell(C(\mathbf{x}), y)] &= \mathbb{E}_{\mathbb{Q}}[-\log p_c(y|\mathbf{x})] \\ &= \int p_g(\mathbf{x}, y) \log \frac{p_g(\mathbf{x}, y)}{p_c(\mathbf{x}, y)p_g(y|\mathbf{x})} d(\mathbf{x}, y) \\ &= \int p_g(\mathbf{x}, y) \log \frac{p_g(\mathbf{x}, y)}{p_c(\mathbf{x}, y)} + p_g(\mathbf{x}, y) \log \frac{1}{p_g(y|\mathbf{x})} d(\mathbf{x}, y) \\ &= D_{KL}(p_g(\mathbf{x}, y)||p_c(\mathbf{x}, y)) + H_g(y|\mathbf{x}). \end{aligned} \quad (4)$$

11 Note that the label  $y$  is provided to  $G$  during generation progress. As a result,  $H_g(y|\mathbf{x})$  is irrelevant  
 12 to  $G$ . By concreting Eq. (4) and Eq. (3), The proof of Theorem 1 is completed.  $\square$

### 13 A.2 Proof of Theorem 2

14 **Theorem 2.** *Consider  $\mathbf{x}$  as the input samples of classifier  $C$ , and the distribution  $\mathbb{Q} \in \mathbb{B}_\epsilon(\hat{\mathbb{P}}_N)$  lays*  
 15 *in a Wasserstein ball centered at  $\hat{\mathbb{P}}_N$  with radius  $\epsilon$ . Then for any  $\epsilon \geq 0$  and  $\alpha \geq 1 + \beta$ , we have*

$$\epsilon \|\nabla_{\mathbf{z}} \ell(\mathbf{z})\|_{\hat{\mathbb{P}}_N}^{\alpha_*} - \epsilon^{\beta+1} \|h(\mathbf{z})\|_{\hat{\mathbb{P}}_N}^{\frac{\alpha}{\alpha-\beta-1}} \leq \mathbb{E}_{\mathbb{Q}}(\ell(\mathbf{z})) - \mathbb{E}_{\hat{\mathbb{P}}_N}(\ell(\mathbf{z})) \leq \epsilon \|\nabla_{\mathbf{z}} \ell(\mathbf{z})\|_{\hat{\mathbb{P}}_N}^{\alpha_*} + \epsilon^{\beta+1} \|h(\mathbf{z})\|_{\hat{\mathbb{P}}_N}^{\alpha_*}, \quad (5)$$

16 where  $\|f(\mathbf{z})\|_{\hat{\mathbb{P}}_N}^\alpha \triangleq (\frac{1}{N} \sum_{i=1, \mathbf{z} \sim \hat{\mathbb{P}}_N}^N (\|f(\mathbf{z}_i)\|^\alpha))^{1/\alpha}$ ,  $\alpha_* = \frac{\alpha}{\alpha-1}$ , and  $h(\mathbf{z})$  is a function and  $\beta \in$   
 17  $(0, 1]$  a constant which satisfy  $\|\nabla_{\mathbf{z}} \ell(\mathbf{z}_1) - \nabla_{\mathbf{z}} \ell(\mathbf{z}_2)\| \leq h(\mathbf{z}_2) \cdot \|\mathbf{z}_1 - \mathbf{z}_2\|^\beta$  for any  $\mathbf{z} = (\mathbf{x}, y) \in \mathcal{Z}$ .

18 In this part, we firstly proof the right part of this theorem which is an upper bound of  $\mathbb{E}_{\mathbb{Q}}(\ell(\mathbf{z})) -$   
 19  $\mathbb{E}_{\hat{\mathbb{P}}_N}(\ell(\mathbf{z}))$ . Then we provide the proof of a lower bound of it. By combining them, the proof of  
 20 theorem 2 is completed.

21 *Proof.* Considering the inner part of the proposed objective function defined as follows,

$$\sup_{\mathbb{Q} \in \mathbb{B}_\epsilon(\hat{\mathbb{P}}_N)} \mathbb{E}_{\mathbb{Q}}[\ell_\theta(\mathbf{z})] = \inf_{\lambda \geq 0} \lambda \epsilon + \sup_{\mathbb{Q} \in \mathcal{M}(\mathcal{Z})} \int_{\mathcal{Z}} \ell_\theta(\mathbf{z}) \mathbb{Q}(\mathrm{d}(\mathbf{z})) - \lambda \cdot d(\mathbb{Q}, \hat{\mathbb{P}}_N). \quad (6)$$

22 Under the situation that the network  $D$  is optimized for calculating the Wasserstein distance, we  
 23 consider the network  $D$  is sufficient to describe the Wasserstein distance. Recall that we define the  
 24 Wasserstein distance as

$$d_W(\mathbb{Q}_1, \mathbb{Q}_2) \triangleq \min_{\Pi \in \mathcal{M}(\Pi)} \left\{ \int_{\mathcal{Z} \times \mathcal{Z}} s(\mathbf{z}_1, \mathbf{z}_2) \Pi(\mathrm{d}(\mathbf{z}_1, \mathbf{z}_2)) \right\}. \quad (7)$$

25 Assuming the metric  $s(\cdot, \cdot)$  is induced by some norm  $\|\cdot\|^\alpha$ , it is easy to be reformulated as follows:

$$d_W(\mathbb{Q}_1, \mathbb{Q}_2) = \min_{\Pi \in \mathcal{M}(\Pi)} \left\{ \int_{\mathcal{Z} \times \mathcal{Z}} \|\mathbf{z}_1 - \mathbf{z}_2\|^\alpha \Pi(\mathrm{d}(\mathbf{z}_1, \mathbf{z}_2)) \right\}. \quad (8)$$

26 Plugging Eq. (8) into Eq. (6) gives us

$$\mathbb{E}_{\mathbb{Q}}(\ell(\mathbf{z})) = \inf_{\lambda \geq 0} \left\{ \lambda \epsilon + \frac{1}{n} \sum_{i=1}^n \sup_{\mathbf{z} \in \mathcal{Z}} (\ell(\mathbf{z}) - \lambda \|\mathbf{z} - \mathbf{z}'_i\|^\alpha) \right\} \quad (9)$$

27 where  $\mathbf{z} \sim \mathbb{Q}$  and  $\mathbf{z}' \sim \hat{\mathbb{P}}_N$ , then we consider a upper bound that

$$\begin{aligned} & \sup_{\mathbf{z} \in \mathcal{Z}} \{\ell(\mathbf{z}) - \ell(\mathbf{z}'_i) - \lambda \cdot \|\mathbf{z} - \mathbf{z}'_i\|^\alpha\} \\ & \leq \sup_{\mathbf{z} \in \mathcal{Z}} \{\|\nabla_{\mathbf{z}} \ell(\mathbf{z}'_i)\|_* \cdot \|\mathbf{z} - \mathbf{z}'_i\| + h(\mathbf{z}'_i) \cdot \|\mathbf{z} - \mathbf{z}'_i\|^{\beta+1} - \lambda \cdot \|\mathbf{z} - \mathbf{z}'_i\|^\alpha\} \\ & \leq \sup_{\mathbf{z} \in \mathcal{Z}} \{\|\nabla_{\mathbf{z}} \ell(\mathbf{z}'_i)\|_* \cdot \|\mathbf{z} - \mathbf{z}'_i\| + h(\mathbf{z}'_i) \cdot \|\mathbf{z} - \mathbf{z}'_i\|^{\beta+1} - \lambda \cdot \|\mathbf{z} - \mathbf{z}'_i\|^\alpha + C \cdot \|\mathbf{z} - \mathbf{z}'_i\|^{\gamma+1}\} \\ & \leq \sup_{\xi \geq 0} \{\|\nabla_{\mathbf{z}} \ell(\mathbf{z}'_i)\|_* \cdot \xi + h(\mathbf{z}'_i) \cdot \xi^{\beta+1} + C \cdot \xi^{\gamma+1} - \lambda \cdot \xi^\alpha\}, \end{aligned} \quad (10)$$

28 where  $0 \leq C$ ,  $1 < \gamma < \beta$  and  $\xi := \|\mathbf{z} - \mathbf{z}'_i\|$ . Following Young's inequality for products that  
 29  $ab \leq \frac{a^p}{p} + \frac{b^q}{q}$ , we set  $p = \frac{\alpha-1}{\alpha-1-\beta}$ ,  $q = \frac{\alpha-1}{\beta}$  satisfying  $\frac{1}{p} + \frac{1}{q} = 1$  and  $a = \varphi^{1/p} \xi^{1/p}$ ,  $b = \varphi^{-1/q} \xi^{\alpha/q}$ .  
 30 Then for any  $t > 0$  and  $\varphi > 0$ , it holds that

$$\xi^{\gamma+1} \leq \xi^{\beta+1} \leq \xi^{\alpha+1} \leq \frac{\alpha-1-\beta}{\alpha-1} \varphi \xi + \frac{\beta}{\alpha-1} \varphi^{-\frac{\alpha-1-\beta}{\beta}} \xi^\alpha. \quad (11)$$

31 Replacing  $\xi^{\gamma+1}$  and  $\xi^{\beta+1}$  with the last term of Eq. (11), it gives us

$$\begin{aligned} & \sup_{\xi \geq 0} \{\|\nabla_{\mathbf{z}} \ell(\mathbf{z}'_i)\|_* \cdot \xi + h(\mathbf{z}'_i) \cdot \xi^{\beta+1} + C \cdot \xi^{\gamma+1} - \lambda \cdot \xi^\alpha\} \\ & \leq \sup_{\xi \geq 0} \left\{ \|\nabla_{\mathbf{z}} \ell(\mathbf{z}'_i)\|_* + \frac{\alpha-\beta-1}{\alpha-1} \cdot h(\mathbf{z}'_i) \cdot \varphi_1 + \frac{\alpha-\gamma-1}{\alpha-1} \cdot C \cdot \varphi_2 \right\} \cdot \xi \\ & \quad - \left( \lambda - \frac{\beta}{\alpha-1} \cdot h(\mathbf{z}'_i) \cdot \varphi_1^{-\frac{\alpha-\beta-1}{\beta}} - \frac{\gamma}{\alpha-1} \cdot C \cdot \varphi_2^{\frac{\alpha-\gamma-1}{\gamma}} \right) \cdot \xi^\alpha \} \\ & \leq \sup_{\xi \geq 0} \{ \mathcal{G}_\varphi(\mathbf{z}'_i) \cdot \xi - (\lambda - \mathcal{N}_\varphi) \cdot \xi^\alpha \}, \end{aligned} \quad (12)$$

32 where  $\mathcal{G}_\varphi(\mathbf{z}'_i) = \|\nabla_{\mathbf{z}} \ell(\mathbf{z}'_i)\|_* + \frac{\alpha-\beta-1}{\alpha-1} \cdot h(\mathbf{z}'_i) \cdot \varphi_1 + \frac{\alpha-\gamma-1}{\alpha-1} \cdot C \cdot \varphi_2$  and  $\mathcal{N}_\varphi = \lambda - \frac{\beta}{\alpha-1} \cdot h(\mathbf{z}'_i) \cdot$   
 33  $\varphi_1^{-\frac{\alpha-\beta-1}{\beta}} - \frac{\gamma}{\alpha-1} \cdot C \cdot \varphi_2^{\frac{\alpha-\gamma-1}{\gamma}}$ . Considering the value of Eq. (12) is  $+\infty$  when  $\lambda \leq \mathcal{N}_\varphi$ , we solve  
 34 Eq. (12) over  $\xi$  and conclude that

$$\begin{aligned} & \mathbb{E}_{\mathbb{Q}}(\ell(\mathbf{z})) - \mathbb{E}_{\hat{\mathbb{P}}_N}(\ell(\mathbf{z})) \\ & \leq \inf_{\lambda \geq \mathcal{N}_\varphi} \left\{ \lambda \epsilon^\alpha + \alpha^{-1-\frac{\alpha}{\alpha-1}} (\alpha-1) (\lambda - \mathcal{N}_\varphi)^{-\frac{1}{\alpha-1}} (\|\mathcal{G}_\varphi\|_{\hat{\mathbb{P}}_N}^{\frac{\alpha}{\alpha-1}})^{\frac{\alpha}{\alpha-1}} \right\} \\ & \leq \epsilon \|\mathcal{G}_\varphi\|_{\hat{\mathbb{P}}_N}^{\frac{\alpha}{\alpha-1}} + \mathcal{N}_\varphi \epsilon^\alpha. \end{aligned} \quad (13)$$

35 Plugging  $\mathcal{G}_\varphi$  and  $\mathcal{N}_\varphi$  into Eq. (13) and solving the minimization problem on  $\varphi$ , we obtain the right  
 36 part of Theorem 2. Next we step to the left part of Theorem 2. We firstly began with a lower bound  
 37 of  $\sup_{\mathbf{Q} \in \mathbb{B}_\epsilon(\hat{\mathbb{P}}_N)} \mathbb{E}_{\mathbf{Q}}(\ell(\mathbf{z})) - \mathbb{E}_{\hat{\mathbb{P}}_N}(\ell(\mathbf{z}))$  as follows:

$$\begin{aligned}
 & \sup_{\mathbf{z}_i \in \mathcal{Z}} \left\{ \frac{1}{N} \sum_{i=1}^N [\ell(\mathbf{z}_i) - \ell(\mathbf{z}'_i)] : \left( \frac{1}{N} \sum_{i=1}^N \|\mathbf{z}_i - \mathbf{z}'_i\|^\alpha \right)^{\frac{1}{\alpha}} \leq \epsilon \right\} \\
 & \geq \sup_{\mathbf{z}_i \in \mathcal{Z}} \left\{ \frac{1}{N} \sum_{i=1}^N [\nabla_{\mathbf{z}} \ell(\mathbf{z}'_i) \|\mathbf{z}_i - \mathbf{z}'_i\| - h(\mathbf{z}'_i) \|\mathbf{z}_i - \mathbf{z}'_i\|^{\beta+1}] : \left( \frac{1}{N} \sum_{i=1}^N \|\mathbf{z}_i - \mathbf{z}'_i\|^\alpha \right)^{\frac{1}{\alpha}} \leq \epsilon \right\} \\
 & \geq \sup_{\mathbf{z}_i \in \mathcal{Z}} \left\{ \frac{1}{N} \sum_{i=1}^N \nabla_{\mathbf{z}} \ell(\mathbf{z}'_i) \|\mathbf{z}_i - \mathbf{z}'_i\| : \left( \frac{1}{N} \sum_{i=1}^N \|\mathbf{z}_i - \mathbf{z}'_i\|^\alpha \right)^{\frac{1}{\alpha}} \leq \epsilon \right\} \\
 & \quad - \sup_{\mathbf{z}_i \in \mathcal{Z}} \left\{ \frac{1}{N} \sum_{i=1}^N h(\mathbf{z}'_i) \|\mathbf{z}_i - \mathbf{z}'_i\|^{\beta+1} : \left( \frac{1}{N} \sum_{i=1}^N \|\mathbf{z}_i - \mathbf{z}'_i\|^\alpha \right)^{\frac{1}{\alpha}} \leq \epsilon \right\}
 \end{aligned} \tag{14}$$

38 Further we conclude that with the help of Holder's inequality,

$$\begin{aligned}
 & \sup_{\mathbf{z}_i \in \mathcal{Z}} \left\{ \frac{1}{N} \sum_{i=1}^N \nabla_{\mathbf{z}} \ell(\mathbf{z}'_i) \|\mathbf{z}_i - \mathbf{z}'_i\| : \left( \frac{1}{N} \sum_{i=1}^N \|\mathbf{z}_i - \mathbf{z}'_i\|^\alpha \right)^{\frac{1}{\alpha}} \leq \epsilon \right\} \\
 & = \sup_{\xi \in \mathbb{R}} \left\{ \frac{1}{N} \sum_{i=1}^N \nabla_{\mathbf{z}} \ell(\mathbf{z}'_i) \xi_i : \left( \frac{1}{N} \sum_{i=1}^N \xi_i^\alpha \right)^{\frac{1}{\alpha}} \leq \epsilon \right\} \\
 & = \epsilon \|\nabla_{\mathbf{z}} \ell(\mathbf{z})\|_{\hat{\mathbb{P}}_N}^{\alpha*}.
 \end{aligned} \tag{15}$$

39 Wee also have that

$$\begin{aligned}
 & \sup_{\mathbf{z}_i \in \mathcal{Z}} \left\{ \frac{1}{N} \sum_{i=1}^N h(\mathbf{z}'_i) \|\mathbf{z}_i - \mathbf{z}'_i\|^{\beta+1} : \left( \frac{1}{N} \sum_{i=1}^N \|\mathbf{z}_i - \mathbf{z}'_i\|^\alpha \right)^{\frac{1}{\alpha}} \leq \epsilon \right\} \\
 & = \sup_{\xi \in \mathbb{R}} \left\{ \frac{1}{N} \sum_{i=1}^N \nabla_{\mathbf{z}} h(\mathbf{z}'_i) \xi_i^{\beta+1} : \left( \frac{1}{N} \sum_{i=1}^N \xi_i^\alpha \right)^{\frac{1}{\alpha}} \leq \epsilon \right\} \\
 & = \epsilon^{\beta+1} \|h(\mathbf{z})\|_{\hat{\mathbb{P}}_N}^{\frac{\alpha}{\alpha-\beta-1}}.
 \end{aligned} \tag{16}$$

40 The proof is completed.  $\square$

### 41 A.3 Proof of Theorem 3

42 **Theorem 3.** For any  $0 < \delta < 1$ , with probability at least  $1 - \delta$  with respect to the sampling,

$$\mathbb{E}(\ell(C(\mathbf{x}, \boldsymbol{\theta}), y)) \leq \mathbb{E}_{\mathbf{Q}}(\ell(C(\mathbf{x}, \boldsymbol{\theta}), y)) + \frac{12\sqrt{R}}{n} (\log \frac{n}{3\sqrt{R}} + 1) + \sqrt{\frac{8 \log(2/\delta)}{N}}, \tag{17}$$

43 and for any  $\zeta > \frac{12\sqrt{R}}{n} (\log \frac{n}{3\sqrt{R}} + 1) + \sqrt{\frac{8 \log(2/\delta)}{N}}$ , we have

$$P(\ell(C(\mathbf{x}, \boldsymbol{\theta}), y) \geq \mathbb{E}_{\mathbf{Q}}(\ell(C(\mathbf{x}, \boldsymbol{\theta}), y)) + \zeta) \leq \frac{\mathbb{E}_{\mathbf{Q}}(\ell(C(\mathbf{x}, \boldsymbol{\theta}), y)) + \frac{12\sqrt{R}}{n} (\log \frac{n}{3\sqrt{R}} + 1) + \sqrt{\frac{8 \log(2/\delta)}{N}}}{\mathbb{E}_{\mathbf{Q}}(\ell(C(\mathbf{x}, \boldsymbol{\theta}), y)) + \zeta}. \tag{18}$$

44 where  $R$  is only related to the architecture of the neural network.

45 *Proof.* As description in the Theorem 8 in [2], for any integer  $N$  and  $\delta \in (0, 1)$ , the risk bounds can  
 46 be written as that

$$\mathbf{EL}(Y, f(X)) \leq \hat{\mathbf{E}}_N \phi(Y, f(X)) + \mathfrak{R}_N(\tilde{\phi} \circ F) + \sqrt{\frac{8 \ln(2/\delta)}{N}}. \tag{19}$$

47 Setting the loss function  $\mathcal{L}$  and  $Y$  as  $\mathcal{L}(\mathbf{x}, y) = \phi(\mathbf{x}, y) = \ell(C(\mathbf{x}, \boldsymbol{\theta}), y)$ , it yields that

$$\mathbb{E}(\ell(C(\mathbf{x}, \boldsymbol{\theta}), y)) \leq \mathbb{E}_{\mathbb{Q}}(\ell(C(\mathbf{x}, \boldsymbol{\theta}), y)) + 2\Re_N(\ell(C(\mathbf{x}, \boldsymbol{\theta}), y)) + \sqrt{\frac{8 \ln(2/\delta)}{N}}, \quad (20)$$

48 We use Lemma A.8 in [1] and get the Rademacher complexity estimate of neural networks  $C$  with  
49 loss function  $\ell$  as follows,

$$\Re_N(\ell(C(\mathbf{x}, \boldsymbol{\theta}), y)) = \frac{12\sqrt{R}}{n}(\log \frac{n}{3\sqrt{R}} + 1), \quad (21)$$

50 where  $R$  is only related with the architecture of neural network and defined as follows and the detailed  
51 notation can be find in [1],

$$R = \frac{4B^2 \ln(2W^2)}{\gamma^2 \epsilon^2} \left( \prod_{j=1}^L s_j^2 \rho_j^2 \right) \left( \sum_{i=1}^L \left( \frac{b_i}{s_i} \right)^{2/3} \right)^3. \quad (22)$$

52 Plugging result in Eq. (21) into Eq. (20) drives the first part of Theorem 3. Further, we can easily  
53 obtain the second part of Theorem 3 by applying Markov's inequality here to obtain,

$$\begin{aligned} P(\ell(C(\mathbf{x}, \boldsymbol{\theta}), y) \geq \mathbb{E}_{\mathbb{Q}}(\ell(C(\mathbf{x}, \boldsymbol{\theta}), y)) + \zeta) &\leq \frac{\mathbb{E}(\ell(C(\mathbf{x}, \boldsymbol{\theta}), y))}{\mathbb{E}_{\mathbb{Q}}(\ell(C(\mathbf{x}, \boldsymbol{\theta}), y)) + \zeta} \\ &\leq \frac{\mathbb{E}_{\mathbb{Q}}(\ell(C(\mathbf{x}, \boldsymbol{\theta}), y)) + \frac{12\sqrt{R}}{n}(\log \frac{n}{3\sqrt{R}} + 1) + \sqrt{\frac{8 \log(2/\delta)}{N}}}{\mathbb{E}_{\mathbb{Q}}(\ell(C(\mathbf{x}, \boldsymbol{\theta}), y)) + \zeta} \end{aligned} \quad (23)$$

54 which completes the proof.  $\square$

#### 55 A.4 Proof of Theorem 4

56 **Theorem 4.** For the generator  $G$  and classifier  $C$  fixed, the optimal discriminator  $D$  is

$$D_{G,C}^*(\mathbf{x}, y) = \frac{p_{data}(\mathbf{x}, y)}{p_{data}(\mathbf{x}, y) + p_g(\mathbf{x}, y)}, \quad (24)$$

57 where  $p_g(\mathbf{x})$  is the distribution generated by  $G$ .

58 *Proof.* Given the generator and classifier, the loss function can be written as

$$\begin{aligned} V(D) &= \int p_{data}(\mathbf{z}) \log D(\mathbf{z}) d\mathbf{z} + \int p_g(\mathbf{z}) \log(1 - D(\mathbf{z})) d\mathbf{z} \\ &= \int p_d(\mathbf{z}) \log D(\mathbf{z}) + p_g(\mathbf{z}) \log(1 - D(\mathbf{z})) d\mathbf{z}. \end{aligned} \quad (25)$$

59 Following the proof in GAN [3], the function  $V(D)$  achieves its maximum at  $\frac{p_{data}(\mathbf{z})}{p_{data}(\mathbf{z}) + p_g(\mathbf{z})}$ .  $\square$

#### 60 A.5 Proof of Theorem 5

61 **Theorem 5.** With the optimal discriminator  $D$  and the classifier  $C$  fixed, the optimization of generator  
62  $G$  is equivalent to  $-\log 4 + 2JSD(\hat{\mathbb{P}}_N || \mathbb{Q}) - 1/\lambda \cdot D_{KL}(\mathbb{Q} || \mathbb{P}_c)$ .

63 *Proof.* Following the conclusion obtained in Theorem 4, with the optimal  $D_{G,C}^*(\mathbf{x}, y) =$   
64  $\frac{p_{data}(\mathbf{x}, y)}{p_{data}(\mathbf{x}, y) + p_g(\mathbf{x}, y)}$ , the minimax game for  $G$  can be reformulated as:

$$\begin{aligned} V(G, C) &= \int p_{data}(\mathbf{z}) \log \frac{p_{data}(\mathbf{z})}{p_{data}(\mathbf{z}) + p_g(\mathbf{z})} d\mathbf{z} + \int p_g(\mathbf{z}) \log \frac{p_g(\mathbf{z})}{p_{data}(\mathbf{z}) + p_g(\mathbf{z})} d\mathbf{z} + \lambda \int p_g(\mathbf{z}) \ell(\mathbf{z}) d\mathbf{z} \\ &= -\log 4 + 2JSD(p_{data}(\mathbf{z}) || p_g(\mathbf{z})) d\mathbf{z} + \lambda \int p_g(\mathbf{z}) [-\log p_c(\mathbf{z})] d\mathbf{z} \\ &= -\log 4 + 2JSD(p_{data}(\mathbf{z}) || p_g(\mathbf{z})) d\mathbf{z} + \lambda(D_{KL}((p_g(\mathbf{z}) || p_c(\mathbf{z})) + H_g(y|\mathbf{x})). \end{aligned} \quad (26)$$

65 Noting that the label  $y$  in  $p_g(\mathbf{x}, y)$  is assigned during the generation,  $H_g(y|\mathbf{x})$  is a constant  
66 which is irrelevant with  $G$ . As a result, the generator  $G$  will be optimized by  $-\log 4 +$   
67  $2JSD(p_{data}(\mathbf{z}) || p_g(\mathbf{z})) d\mathbf{z} + \lambda D_{KL}((p_g(\mathbf{z}) || p_c(\mathbf{z})))$ , which completes the proof.  $\square$

## 68 B Algorithm

---

### Algorithm 1 Proposed Method

---

**Input:** The batch size  $m$ , the loss balanced coefficient  $\lambda$ .

Initialize generator parameters  $\theta_g$  for  $G$ ,  $\theta_d$  for  $D$ , and  $\theta_c$  for  $C$  with the training set  $\{(\mathbf{x}_1, y_1), (\mathbf{x}_2, y_2), \dots, (\mathbf{x}_N, y_N)\}$ .

Sample a batch of pairs  $(\mathbf{x}_g, y_g) \sim p_g(\mathbf{x}, y)$  and a batch of pairs  $(\mathbf{x}_d, y_d) \sim p_d(\mathbf{x}, y)$ .

Update  $D$  by ascending along its gradients  $\nabla_{\theta_d} \left[ \frac{1}{m} \left( \sum_{(\mathbf{x}_d, y_d)} D(\mathbf{x}_d, y_d) - \sum_{(\mathbf{x}_g, y_g)} D(\mathbf{x}_g, y_g) \right) \right]$

Update  $G$  by ascending along its gradients  $\nabla_{\theta_g} \left[ \frac{1}{m} \left( \lambda \cdot \sum_{(\mathbf{x}_g, y_g)} D(\mathbf{x}_g, y_g) - \sum_{(\mathbf{x}_d, y_d)} C(\mathbf{x}_g, y_g) \right) \right]$

Update  $C$  by ascending along its gradients  $\nabla_{\theta_c} \left[ \frac{1}{m} \left( \sum_{(\mathbf{x}_d, y_d)} \ell(C(\mathbf{x}_g, \theta), y_g) \right) \right]$

**Output:** A distribution optimized classifier  $C$  and a worst-case distribution generator  $G$ .

---

## 69 References

- 70 [1] P. L. Bartlett, D. J. Foster, and M. J. Telgarsky. Spectrally-normalized margin bounds for neural networks.  
71 In *Advances in Neural Information Processing Systems*, pages 6240–6249, 2017.
- 72 [2] P. L. Bartlett and S. Mendelson. Rademacher and gaussian complexities: Risk bounds and structural results.  
73 *Journal of Machine Learning Research*, 3(Nov):463–482, 2002.
- 74 [3] I. Goodfellow, J. Pouget-Abadie, M. Mirza, B. Xu, D. Warde-Farley, S. Ozair, A. Courville, and Y. Bengio.  
75 Generative adversarial nets. In *Advances in neural information processing systems*, pages 2672–2680, 2014.
